# Supplementary material
Source: PubMed Central journal article supplement (PMC4153739)
Supplement: NIHMS381820-supplement-1_si_001.pdf [file NIHMS381820-supplement-1_si_001.pdf]

## **Supporting Information**

### **Conantokins Derived from the *Asprella* Clade Impart ConRI-B, an NMDA Receptor Antagonist with a Unique Selectivity Profile for NR2B Subunits**

Konkallu Hanumae Gowd, Tiffany S. Han, Vernon Twede, Joanna Gajewiak,  
Misty D. Smith, Maren Watkins, Randy Platt, Gabriela Toledo, H. Steve White,  
Baldomero M. Olivera, Grzegorz Bulaj

**Table S1.** Selected examples of antagonists for NMDARs containing NR2B subunit.

| NR2B antagonist                                                                               | NR1/NR2B IC <sub>50</sub> or K <sub>i</sub> (μM) | Off Target Activity                                                                                                                                                                               | References                                                                                                                                                                              |
|-----------------------------------------------------------------------------------------------|--------------------------------------------------|---------------------------------------------------------------------------------------------------------------------------------------------------------------------------------------------------|-----------------------------------------------------------------------------------------------------------------------------------------------------------------------------------------|
| Ifenprodil                                                                                    | .03                                              | Sigma-1, Sigma-2, Alpha-1 adrenergic receptor; GIRK channels, hERG channels; serotonin (5-hydroxytryptamine; 5-HT) subtype 1A, 5-HT2 and 5-HT3 receptors, voltage-gated Ca <sup>2+</sup> channels | Hashimoto & London 1993; Kobayashi et al., 2006; Monassier et al., 2007; Chenard et al., 1991; McCool & Lovinger, 1995; Church et al., 1994; Bath et al., 1996; Chenard & Menniti, 1999 |
| Ro 25-6981                                                                                    | .009                                             | Alpha-1 adrenergic receptor                                                                                                                                                                       | Fischer et al., 1997; Pinard et al., 2001                                                                                                                                               |
| CP 101,606                                                                                    | .014                                             | Sigma-1 receptor; hERG channel                                                                                                                                                                    | Hashimoto & London, 1993; Cougenhour & Barr, 2001; Kawai et al., 2007                                                                                                                   |
| Eliprodil                                                                                     | .128                                             | Alpha-1 adrenergic receptors; Voltage-gated Na <sup>+</sup> channels; Voltage-gated Ca <sup>2+</sup> channels                                                                                     | Chenard & Menniti, 1999                                                                                                                                                                 |
| N-(2-(3,4-Dichlorophenylamino)ethyl)-2-(4-methylsulfonamido)phenoxyacetamide (Compound 52)    | .054                                             | Weakly targets hERG channel                                                                                                                                                                       | Mosley et al., 2009                                                                                                                                                                     |
| (S)-1-(4-Methanesulfonamidephenoxy)-3-(3,4-dichlorophenylethylamino)-2-propanol (Compound 29) | .050                                             | hERG; Alpha-1 and alpha-2 adrenergic receptors; Serotonin, dopamine, and norepinephrine transporters                                                                                              | Tahirovic et al., 2008                                                                                                                                                                  |
| Clobenpropit/<br>Iodophenpropit                                                               | 1-1.4                                            | Histamine 3 receptor                                                                                                                                                                              | Hansen et al., 2010                                                                                                                                                                     |
| 7-methoxy-3-(4-phenylbutyl)-2,3,4,5,-tetrahydro-1H-3-benzazepin-1-ol (Compound 13)            | .005                                             | Some activity at sigma-1 and sigma-2 receptor at higher concentrations (K <sub>i</sub> ~180 nM, ~550 nM respectively)                                                                             | Tewes et al., 2010; Beinat et al., 2010                                                                                                                                                 |
| 4-Methylbenzyl 4-[(Pyrimidin-2-ylamino)methyl]piperidine-1-carboxylate (Compound 20j)         | .003 (k <sub>i</sub> )                           | IC50 for hERG channel >10μM; no other activity at any “off targets” tested (10 μM concentration) (disclaimer: data not shown.)                                                                    | Liverton et al., 2007                                                                                                                                                                   |

**Table S2.** Purity, HPLC retention times and mass spectrometry results for conantokins studied in this work.

| Peptide                   | Purity | RT <sup>a</sup><br>[min] | MS (calcul.)<br>[M] | MS (found.)<br>[M+1] |
|---------------------------|--------|--------------------------|---------------------|----------------------|
| ConRI-B                   | 98%    | 24.38                    | 2236.96             | 2237.94              |
| ConRI-B[O10P]             | 98%    | 23.00                    | 2220.96             | 2221.95              |
| ConRI-B[O10A]             | 98%    | 32.60                    | 2194.94             | 2195.92              |
| ConRI-B[K7X] <sup>b</sup> | 100%   | 29.64                    | 2221.95             | 2222.90              |
| ConRI-B[desO10]           | 98%    | 20.87                    | 2123.90             | 2124.88              |
| ConRI-B[L5Y]              | 99%    | 19.78 <sup>c</sup>       | 2286.90             | 2287.50              |
| ConRI-B[desKAO;N8Q9]      | 100%   | 18.98 <sup>c</sup>       | 2166.85             | 2167.40              |
| ConRI-C                   | 100%   | 32.33                    | 2224.91             | 2225.93              |
| ConRI-B[γ7K]              | 100%   | 26.15 <sup>c</sup>       | 2192.02             | 2192.99              |
| ConRI-B[γ15K]             | 100%   | 25.60 <sup>c</sup>       | 2192.02             | 2192.99              |

<sup>a</sup> RT determined on analytical C<sub>18</sub> Vydac reversed-phase HPLC with a flow rate 1mL/min and linear gradient 20%-50% of solvent B (solvent A – 0.1% (v/v) TFA in water; solvent B – 0.1% TFA (v/v) TFA n 90% aqueous acetonitrile)

<sup>b</sup> X denotes L-norleucine

<sup>c</sup> RT determined on analytical C<sub>18</sub> Vydac reversed-phase HPLC with a flow rate 1mL/min and linear gradient 15%-45% of solvent B

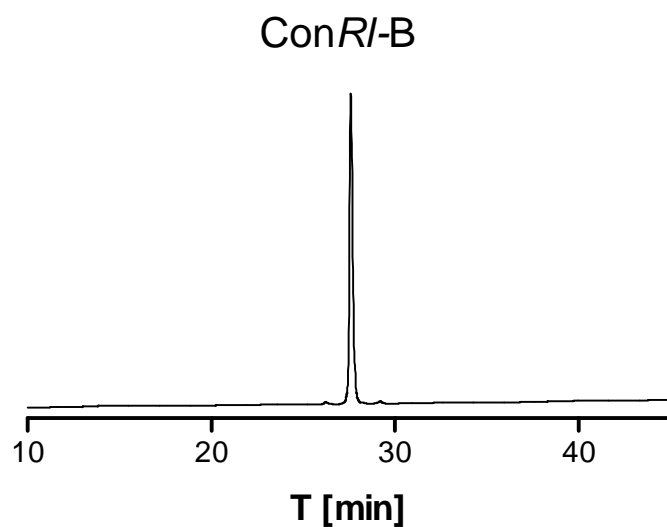

**Figure S1.** Example of an HPLC trace of synthetic ConRI-B recorded on analytical C<sub>18</sub> Vydac reversed-phase HPLC with a flow rate 1mL/min and linear gradient 20%-50% of solvent B (solvent A – 0.1% (v/v) TFA in water; solvent B – 0.1% TFA (v/v) TFA in 90% aqueous acetonitrile).

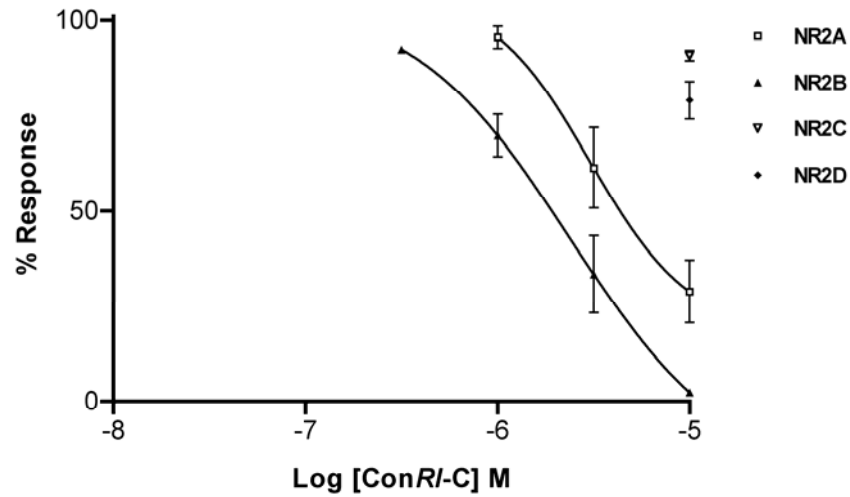

**Figure S2.** Concentration-response curve of ConRI-C on the four different NR2 subunits of NMDA receptor separately co-expressed with NR1-2b in *Xenopus* oocytes (n=3 tests for each data point; error bars represent standard error of the mean (SEM). Curve fitting was performed as described in experimental procedures.

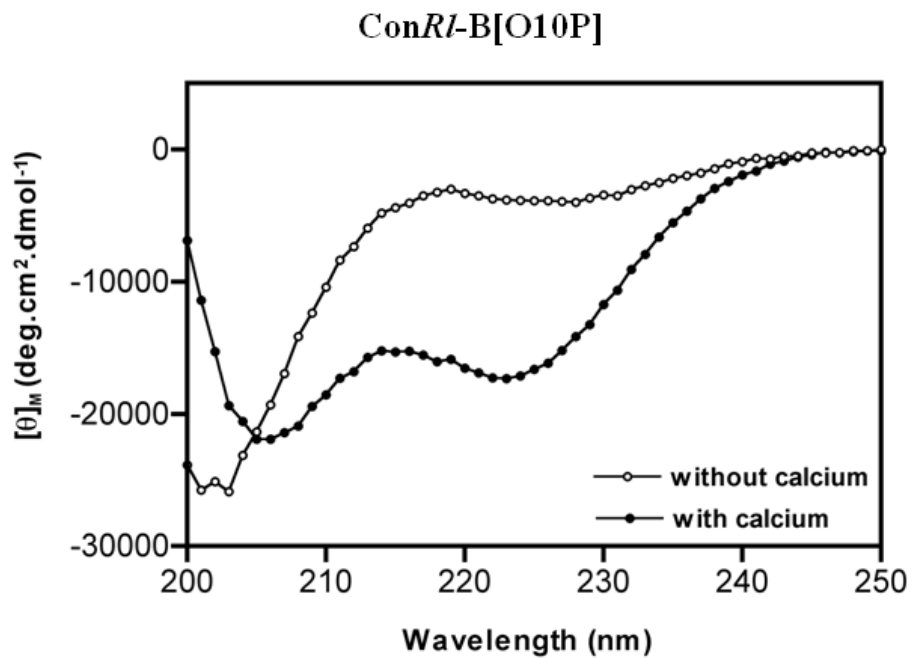

**Figure S3.** Circular dichroism spectroscopy of ConRI-B[O10P]. Spectra were recorded with (or) without 2mM CaCl<sub>2</sub> containing 10 mM HEPES buffer at pH 7.0 and shown is an average spectra obtained from five independent scans (n=5). Estimated percentage of helicity of peptide in the absence of calcium is 11% and in the presence of calcium is 51%.

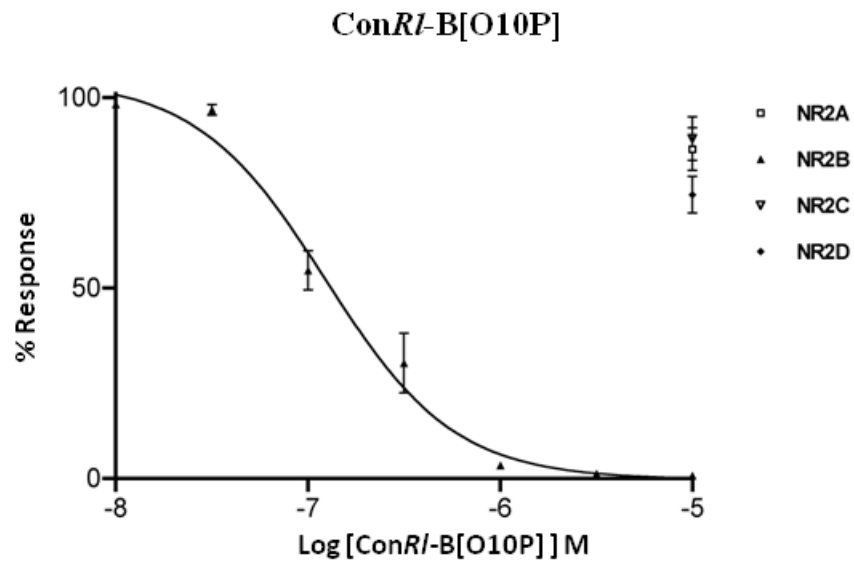

**Figure S4.** Concentration-response curve of ConRI-B[O10P] on the four different NR2 subunits of NMDA receptor separately co-expressed with NR1-2b in *Xenopus* oocytes (n=3 tests for each data point; error bars represent standard error of the mean (SEM). Curve fitting was performed as described in experimental procedures. The approximate IC<sub>50</sub> value of ConRI-B[O10P] for NR2B subunit of NMDA receptor is 0.12μM, similar to that of ConRI-B having 0.1μM.

## References

1. Hashimoto and London ED (1993) Further characterization of [3H]ifenprodil binding to sigma receptors in rat brain. *Eur. J. Pharmacol.* **236**:159–163.
2. Kobayashi T, Washiyama K, and Ikeda K (2006) Inhibition of G protein-activated inwardly rectifying K<sup>+</sup> channels by ifenprodil. *Neuropsychopharmacology* **31**:516-524.
3. Monassier L, Manoury B, Bellocq C, Weissenburger J, Grenay H, Zimmermann D, Ehrhardt JD, Jaillon P, Baró I, and Bousquet P (2007) sigma(2)-receptor ligand-mediated inhibition of inwardly rectifying K(+) channels in the heart. *J Pharmacol Exp Ther.* **322**:341-350.
4. Chenard BL, Shalaby IA, Koe BK, Ronau RT, Butler TW, Prochniak MA, Schmidt AW, and Fox CB (1991) Separation of alpha 1 adrenergic and N-methyl-D-aspartate antagonist activity in a series of ifenprodil compounds. *J Med Chem.* **34**:3085-3090.
5. McCool BA and Lovinger DM (1995) Ifenprodil inhibition of the 5-hydroxytryptamine<sub>3</sub> receptor. *Neuropharmacology.* **34**:621-629.
6. Church J, Fletcher EJ, Baxter K, and MacDonald JF (1994) Blockade by ifenprodil of high voltage-activated Ca<sup>2+</sup> channels in rat and mouse cultured hippocampal pyramidal neurones: comparison with N-methyl-D-aspartate receptor antagonist actions. *Br J Pharmacol.* **113**:499-507.
7. Bath CP, Farrell LN, Gilmore J, Ward MA, Hicks CA, O'Neill MJ, and Bleakman D (1996). The effects of ifenprodil and eliprodil on voltage-dependent Ca<sup>2+</sup> channels and in gerbil global cerebral ischaemia. *Eur J Pharmacol.* **299**:103-112.
8. Chenard BL and Menniti FS (1999) Antagonists selective for NMDA receptors containing the NR2B subunit. *Curr Pharm Des.* **5**:381-404.
9. Fischer G, Mutel V, Trube G, Malherbe P, Kew JN, Mohacsi E, Heitz MP, and Kemp JA (1997) Ro 25-6981, a highly potent and selective blocker of N-methyl-D-aspartate receptors containing the NR2B subunit. Characterization in vitro. *J Pharmacol Exp Ther.* **283**:1285-1292.
10. Pinard E, Alanine A, Bourson A, Büttelmann B, Gill R, Heitz M, Jaeschke G, Mutel V, Trube G, and Wyler R (2001) Discovery of (R)-1-[2-hydroxy-3-(4-hydroxy-phenyl)-propyl]-4-(4-methyl-benzyl)-piperidin-4-ol: a novel NR1/2B subtype selective NMDA receptor antagonist. *Bioorg Med Chem Lett.* **11**:2173-2186.



11. Coughenour LA and Barr BM (2001) Use of trifluoroperazine isolates a [<sup>3</sup>H]ifenprodil binding site in rat brain membranes with the pharmacology of the voltage-independent ifenprodil site on N-methyl-d-aspartate receptors containing NR2B subunits. *J Pharmacol Exp Ther.* **296**:150-159.
12. Kawai M, Ando K, Matsumoto Y, Sakurada I, Hirota M, Nakamura H, Ohta A, Sudo M, Hattori K, Takashima T, Hizue M, Watanabe S, Fujita I, Mizutani M, and Kawamura M (2007) Discovery of (-)-6-[2-[4-(3-fluorophenyl)-4-hydroxy-1-piperidinyl]-1-hydroxyethyl]-3,4-dihydro-2(1H)-quinolinone--a potent NR2B-selective N-methyl D-aspartate (NMDA) antagonist for the treatment of pain. *Bioorg Med Chem Lett.* **17**:5558-5562.
13. Mosley CA, Myers SJ, Murray EE, Santangelo R, Tahirovic YA, Kurtkaya N, Mullasseril P, Yuan H, Lyuboslavsky P, Le P, Wilson LJ, Yepes M, Dingledine R, Traynelis SF, and Liotta DC. (2009) Synthesis, structural activity-relationships, and biological evaluation of novel amide-based allosteric binding site antagonists in NR1A/NR2B N-methyl-D-aspartate receptors. *Bioorg Med Chem.* **17**:6463-6480.
14. Tahirovic YA, Geballe M, Gruszecka-Kowalik E, Myers SJ, Lyuboslavsky P, Le P, French A, Irier H, Choi WB, Easterling K, Yuan H, Wilson LJ, Kotloski R, McNamara JO, Dingledine R, Liotta DC, Traynelis SF, and Snyder JP (2008) Enantiomeric propanolamines as selective N-methyl-D-aspartate 2B receptor antagonists. *J Med Chem.* **51**:5506-5521.
15. Tewes B, Frehland B, Schepmann D, Schmidtke KU, Winckler T, and Wunsch B (2010) Design, Synthesis, and Biological Evaluation of 3-Benzazepin-1-ols as NR2B-Selective NMDA Receptor Antagonists. *ChemMedChem.* **5**:687-695.
16. Beinat C, Banister S, Moussa I, Reynolds AJ, McErlean CS, and Kassiou M (2010) Insights into structure-activity relationships and CNS therapeutic applications of NR2B selective antagonists. *Curr Med Chem.* **17**:4166-4190.
17. Liverton NJ, Bednar RA, Bednar B, Butcher JW, Claiborne CF, Claremon DA, Cunningham M, DiLella AG, Gaul SL, Libby BE, Lyle EA, Lynch JJ, McCauley JA, Mosser SD, Nguyen KT, Stump GL, Sun H, Wang H, Yergey J, and Koblan KS (2007) Identification and characterization of 4-methylbenzyl 4-[(pyrimidin-2-ylamino)methyl]piperidine-1-carboxylate, an orally bioavailable, brain penetrant NR2B selective N-methyl-D-aspartate receptor antagonist. *J Med Chem.* **50**:807-819.
